# Supplementary material for: Multi-Omics Analysis of Gene and microRNA Expression in Diploid and Autotetraploid Poplar under Drought Stress by Transcriptome, microRNA, and Degradome Sequencing
Source: MDPI journal article supplement (doi:10.3390/f14112268), 2023-11-19
Supplement: s1 [file s1]

Table S1. Primer sequences used in this study

| Gene ID          | Sequence(5'-3')                                   |
|------------------|---------------------------------------------------|
| Potri.002G030900 | GGGCAAGGGATGAAGGAGTTTA<br>CTCCAGTCCAATAGCACCCCTT  |
| Potri.004G059600 | ATCAGTTCCCCAAGTGGAATCC<br>GACGGGATAGTCTACAGCAAGG  |
| Potri.011G153300 | TAGGAGAGGCAATCCCAGAAGA<br>ATGAGCCTTTGGGACTCTCAAG  |
| Potri.006G209200 | TGGGTACTGAGATGAGAGCTCA<br>AGCACCATTTCTAATTGCTCCCA |
| Potri.012G067600 | ATCCTCCGCCCAATGAATATCC<br>AGTCCGCAGATTAAGAAAGCCA  |
| Potri.013G090300 | CGCAAGTATGAACAAGGTTGCA<br>GGGATGTTTCTGCATGTATGGC  |
| Potri.015G033600 | GAAGAGGTAGATCAGCGGGAAG<br>TCACTCATTTGACACACCACCA  |
| Potri.017G082900 | GATGGCTGTGGAGAATTCATGC<br>CACGACGGTGGAATTACGATG   |

Table S2 The statistic of transcriptome sequence quality pre- and post- processing

| Sample  | Raw Data         | Valid Data       | Valid Ratio<br>(reads)% | Q30%  | Mapped<br>reads | Mapping<br>Rate(%) |
|---------|------------------|------------------|-------------------------|-------|-----------------|--------------------|
| CK_Di1  | 40937780(6.14G)  | 39151098(5.87G)  | 95.64                   | 98.12 | 33724066        | 86.14              |
| CK_Di2  | 41709612(6.26G)  | 40690354(6.10G)  | 97.56                   | 98.00 | 35103839        | 86.27              |
| CK_Di3  | 50525036(7.58G)  | 49441064(7.42G)  | 97.85                   | 98.30 | 42762384        | 86.49              |
| CK_Te1  | 43254944(6.49G)  | 42966190(6.44G)  | 99.33                   | 98.54 | 37494494        | 87.27              |
| CK_Te2  | 31076296(4.66G)  | 30854578(4.63G)  | 99.29                   | 98.42 | 26829187        | 86.95              |
| CK_Te3  | 52471146(7.87G)  | 52144852(7.82G)  | 99.38                   | 98.35 | 45309079        | 86.89              |
| Dro_Di1 | 44638308(6.70G)  | 44340014(6.65G)  | 99.33                   | 98.20 | 38456220        | 86.73              |
| Dro_Di2 | 35263734(5.29G)  | 35017318(5.25G)  | 99.30                   | 98.72 | 30431223        | 86.90              |
| Dro_Di3 | 32687338(4.90G)  | 32430362(4.86G)  | 99.21                   | 98.31 | 28024075        | 86.41              |
| Dro_Te1 | 35550550(5.33G)  | 34435186(5.17G)  | 96.86                   | 97.86 | 30053391        | 87.28              |
| Dro_Te2 | 41329582(6.20G)  | 40052292(6.01G)  | 96.91                   | 98.33 | 35209046        | 87.91              |
| Dro_Te3 | 53784504(8.07G)  | 51985308(7.80G)  | 96.65                   | 98.37 | 45873025        | 88.24              |
| Re_Di1  | 38919728(5.84G)  | 37922010(5.69G)  | 97.44                   | 98.09 | 32525493        | 85.77              |
| Re_Di2  | 37712898(5.66G)  | 36464632(5.47G)  | 96.69                   | 98.04 | 31365395        | 86.02              |
| Re_Di3  | 37473760(5.62G)  | 35857588(5.38G)  | 95.69                   | 98.13 | 30996166        | 86.44              |
| Re_Te1  | 46309984(6.95G)  | 43773740(6.57G)  | 94.52                   | 97.92 | 38271237        | 87.43              |
| Re_Te2  | 71430152(10.71G) | 69306878(10.40G) | 97.03                   | 98.50 | 60920266        | 87.90              |
| Re_Te3  | 40043120(6.01G)  | 37687786(5.65G)  | 94.12                   | 97.82 | 32748733        | 86.89              |

Note: Raw Data: Raw Data statistics, sequence reads and bases of each sample; Valid Data: The effective data volume statistics, the reads number and proportion of each sample after quality pretreatment, the total number of bases (bases) and the proportion and average length; Q30: The quality score is not less than30 (Single base error rate 0.001) base number and proportion.

Table.S3 The opposite expression co-DEGs on the compared tetraploid with diploid during drought condition

| Gene name        | Te | Di   | Gene symbol | Annotation                                                                          |
|------------------|----|------|-------------|-------------------------------------------------------------------------------------|
| Potri.019G088200 | up | down | AT1G17860   | Kunitz family trypsin and protease inhibitor protein                                |
| Potri.013G080400 | up | down | AT4G24350   | Phosphorylase superfamily protein                                                   |
| Potri.013G082800 | up | down | AT4G24340   | Phosphorylase superfamily protein                                                   |
| Potri.009G114800 | up | down | AT1G49310   | transmembrane protein                                                               |
| Potri.013G080450 | up | down | AT4G24350   | Phosphorylase superfamily protein                                                   |
| Potri.013G082700 | up | down | AT4G24340   | Phosphorylase superfamily protein                                                   |
| Potri.019G031200 | up | down | APY2        | apyrase 2                                                                           |
| Potri.009G042500 | up | down | IRX12       | Laccase/Diphenol oxidase family protein                                             |
| Potri.012G130900 | up | down | ATS3        | Embryo-specific protein 3, (ATS3)                                                   |
| Potri.013G103800 | up | down | AT1G75280   | NmrA-like negative transcriptional regulat-<br>or family protein                    |
| Potri.015G129400 | up | down | FLA11       | FASCICLIN-like arabinogalactan-protein 11                                           |
| Potri.009G092300 | up | down | AGP18       | arabinogalactan protein 18                                                          |
| Potri.002G111900 | up | down | TUA2        | tubulin alpha-2 chain                                                               |
| Potri.002G257900 | up | down | CESA4       | cellulose synthase A4                                                               |
| Potri.018G103900 | up | down | IRX3        | Cellulose synthase family protein                                                   |
| Potri.010G141600 | up | down | CTL2        | chitinase-like protein 2                                                            |
| Potri.001G280200 | up | down | MDIS1       | Leucine-rich repeat protein kinase family protein                                   |
| Potri.010G183500 | up | down | LAC12       | laccase 12                                                                          |
| Potri.006G277300 | up | down | CHY1        | beta-hydroxyisobutyryl-CoA hydrolase 1                                              |
| Potri.010G244900 | up | down | FLA17       | FASCICLIN-like arabinogalactan protein 17 precursor                                 |
| Potri.015G060100 | up | down | IRX6        | COBRA-like extracellular glycosylphosph-<br>atidyl inositol-anchored protein family |
| Potri.014G139900 | up | down | AT1G52140   | Avr9/Cf-9 rapidly elicited protein                                                  |
| Potri.019G121801 | up | down | AT1G73325   | Kunitz family trypsin and protease inhibitor protein                                |
| Potri.004G059600 | up | down | IRX1        | cellulose synthase family protein                                                   |
| Potri.001G068100 | up | down | GUT1        | Exostosin family protein                                                            |
| Potri.005G141300 | up | down | IRX15-L     | Protein of unknown function (DUF579)                                                |
| Potri.005G065200 | up | down | AT5G64030   | S-adenosyl-L-methionine-dependent methyltransferases superfamily protein            |
| Potri.006G181900 | up | down | IRX3        | Cellulose synthase family protein                                                   |
| Potri.T029200    | up | down | AT1G73325   | Kunitz family trypsin and protease inhibitor protein                                |

|                         |    |      |           |                                                         |
|-------------------------|----|------|-----------|---------------------------------------------------------|
| <b>Potri.010G184000</b> | up | down | TBL33     | TRICHOME BIREFRINGENCE-LIKE 33                          |
| <b>Potri.004G211900</b> | up | down | AT2G28315 | Nucleotide/sugar transporter family protein             |
| <b>Potri.019G002100</b> | up | down | AT2G03200 | Eukaryotic aspartyl protease family protein             |
| <b>Potri.016G119100</b> | up | down | TBL3      | Plant protein of unknown function (DUF828)              |
| <b>Potri.006G129200</b> | up | down | FLA11     | FASCICLIN-like arabinogalactan-protein 11               |
| <b>Potri.005G232400</b> | up | down | AT1G19715 | Mannose-binding lectin superfamily protein              |
| <b>Potri.004G156500</b> | up | down | MCM4      | Minichromosome maintenance (MCM2/3/5) family protein    |
| <b>Potri.T131500</b>    | up | down | PRB1      | basic pathogenesis-related protein 1                    |
| <b>Potri.003G173300</b> | up | down | MAP65-8   | microtubule-associated protein 65-8                     |
| <b>Potri.001G416800</b> | up | down | GAUT12    | galacturonosyltransferase 12                            |
| <b>Potri.016G111000</b> | up | down | PHT4      | phosphate transporter 4                                 |
| <b>Potri.010G193100</b> | up | down | IRX12     | Laccase/Diphenol oxidase family protein                 |
| <b>Potri.007G031700</b> | up | down | GATL2     | galacturonosyltransferase-like 2                        |
| <b>Potri.016G112000</b> | up | down | IRX12     | Laccase/Diphenol oxidase family protein                 |
| <b>Potri.014G159800</b> | up | down | MPL1      | Myzus persicae-induced lipase 1                         |
| <b>Potri.009G098966</b> | up | down |           |                                                         |
| <b>Potri.001G375700</b> | up | down | IQD10     | IQ-domain 10                                            |
| <b>Potri.008G094700</b> | up | down | KLCR2     | Tetratricopeptide repeat (TPR)-like superfamily protein |
| <b>Potri.014G022600</b> | up | down | AT3G53010 | Domain of unknown function (DUF303)                     |
| <b>Potri.008G061700</b> | up | down | AT3G55646 | TPRXL                                                   |
| <b>Potri.001G055100</b> | up | down | MAP65-8   | microtubule-associated protein 65-8                     |
| <b>Potri.001G289500</b> | up | down | TUA6      | Tubulin/FtsZ family protein                             |
| <b>Potri.T093800</b>    | up | down | CIPK21    | CBL-interacting protein kinase 21                       |
| <b>Potri.002G101600</b> | up | down | EXI1      | hypothetical protein                                    |
| <b>Potri.011G068300</b> | up | down | AT1G29200 | O-fucosyltransferase family protein                     |
| <b>MSTRG.22338</b>      | up | down |           |                                                         |
| <b>Potri.006G137300</b> | up | down | RBOHE     | Riboflavin synthase-like superfamily protein            |
| <b>Potri.014G110400</b> | up | down | GLP10     | germin-like protein 10                                  |
| <b>Potri.009G049900</b> | up | down | HSP17.8   | HSP20-like chaperones superfamily protein               |
| <b>Potri.009G011100</b> | up | down | UXT1      | Nucleotide/sugar transporter family protein             |
| <b>Potri.002G261700</b> | up | down | TRM30     | hypothetical protein                                    |
| <b>Potri.002G082400</b> | up | down | ILL6      | IAA-leucine resistant (ILR)-like gene 6                 |
| <b>Potri.008G026400</b> | up | down | ATCSLA09  | Nucleotide-diphospho-sugar transferases                 |

|                         |    |      |              |                                                                               |
|-------------------------|----|------|--------------|-------------------------------------------------------------------------------|
|                         |    |      |              | superfamily protein                                                           |
| <b>Potri.003G076000</b> | up | down | HSP23.6-MITO | mitochondrion-localized small heat shock protein 23.6                         |
| <b>Potri.004G187201</b> | up | down |              |                                                                               |
| <b>Potri.016G086400</b> | up | down | IRX9         | Nucleotide-diphospho-sugar transferases superfamily protein                   |
| <b>Potri.004G211600</b> | up | down | UBL5A        | Ubiquitin-like superfamily protein                                            |
| <b>Potri.006G110900</b> | up | down | AT2G38600    | HAD superfamily, subfamily IIIB acid phosphatase                              |
| <b>Potri.008G069900</b> | up | down | ESK1         | Plant protein of unknown function (DUF828)                                    |
| <b>Potri.008G073800</b> | up | down | LAC12        | laccase 12                                                                    |
| <b>Potri.006G120400</b> | up | down | AT1G63300    | Myosin heavy chain-related protein                                            |
| <b>Potri.009G129900</b> | up | down | PRP4         | proline-rich protein 4                                                        |
| <b>Potri.014G126000</b> | up | down | EXL2         | EXORDIUM like 2                                                               |
| <b>Potri.001G191400</b> | up | down | AT3G16370    | GDSL-like Lipase/Acylhydrolase superfamily protein                            |
| <b>Potri.004G056500</b> | up | down | SAG12        | senescence-associated gene 12                                                 |
| <b>Potri.019G101900</b> | up | down | EXPB3        | expansin B3                                                                   |
| <b>Potri.004G185000</b> | up | down | CER4         | Jojoba acyl CoA reductase-related male sterility protein                      |
| <b>Potri.011G153300</b> | up | down | NST1         | NAC (No Apical Meristem) domain transcriptional regulator superfamily protein |
| <b>Potri.008G006500</b> | up | down | AT1G71070    | Core-2/I-branching beta-1,6-N-acetylglucosaminyltransferase family protein    |
| <b>Potri.014G029900</b> | up | down | PGSIP3       | plant glycogenin-like starch initiation protein 3                             |
| <b>Potri.008G224300</b> | up | down | SYD          | P-loop containing nucleoside triphosphate hydrolases superfamily protein      |
| <b>Potri.002G227400</b> | up | down | APR3         | APS reductase 3                                                               |
| <b>Potri.011G047300</b> | up | down | LPA1         | tetratricopeptide repeat (TPR)-containing protein                             |
| <b>Potri.006G188300</b> | up | down | ChiC         | Glycosyl hydrolase family protein with chitinase insertion domain             |
| <b>Potri.001G127100</b> | up | down | AT5G45290    | RING/U-box superfamily protein                                                |
| <b>Potri.002G231350</b> | up | down |              |                                                                               |
| <b>Potri.001G268600</b> | up | down | CAD7         | elicitor-activated gene 3-1                                                   |
| <b>MSTRG.6488</b>       | up | down |              |                                                                               |
| <b>Potri.005G134500</b> | up | down | AT3G19080    | SWIB complex BAF60b domain-containing protein                                 |
| <b>Potri.006G094300</b> | up | down | AT3G54040    | PAR1 protein                                                                  |
| <b>Potri.004G187400</b> | up | down | AT1G07400    | HSP20-like chaperones superfamily protein                                     |

|                         |    |      |           |                                                                            |
|-------------------------|----|------|-----------|----------------------------------------------------------------------------|
| <b>Potri.009G009500</b> | up | down | AT5G60720 | Protein of unknown function, DUF547                                        |
| <b>Potri.T140850</b>    | up | down |           |                                                                            |
| <b>Potri.004G187400</b> | up | down | AT1G07400 | HSP20-like chaperones superfamily protein                                  |
| <b>Potri.T117800</b>    | up | down | AT3G14470 | NB-ARC domain-containing disease resistance protein                        |
| <b>Potri.016G103900</b> | up | down | AT5G09850 | Transcription elongation factor (TFIIS) family protein                     |
| <b>Potri.006G149900</b> | up | down | AT2G26695 | Ran BP2/NZF zinc finger-like superfamily protein                           |
| <b>MSTRG.21672</b>      | up | down |           |                                                                            |
| <b>Potri.010G195600</b> | up | down | AT3G55700 | UDP-Glycosyltransferase superfamily protein                                |
| <b>Potri.008G017100</b> | up | down | CAT6      | cationic amino acid transporter 6                                          |
| <b>Potri.010G236700</b> | up | down | CYP94C1   | cytochrome P450, family 94, subfamily C, polypeptide 1                     |
| <b>Potri.004G056000</b> | up | down | SAG12     | senescence-associated gene 12                                              |
| <b>Potri.010G236600</b> | up | down | LAX3      | like AUX1 3                                                                |
| <b>Potri.002G258000</b> | up | down | MIK2      | Leucine-rich repeat receptor-like protein kinase family protein            |
| <b>Potri.010G095200</b> | up | down | CYCD1     | CYCLIN D1                                                                  |
| <b>Potri.010G121800</b> | up | down | AT1G68390 | Core-2/I-branching beta-1,6-N-acetylglucosaminyltransferase family protein |
| <b>Potri.002G101800</b> | up | down | AT1G72220 | RING/U-box superfamily protein                                             |
| <b>Potri.014G113200</b> | up | down | ABCB21    | P-glycoprotein 21                                                          |
| <b>Potri.006G234300</b> | up | down | OZF2      | Zinc finger C-x8-C-x5-C-x3-H type family protein                           |
| <b>Potri.004G056100</b> | up | down | SAG12     | senescence-associated gene 12                                              |
| <b>Potri.012G055300</b> | up | down | AT1G48780 | hypothetical protein                                                       |
| <b>Potri.010G072200</b> | up | down | PRP1      | proline-rich protein 1                                                     |
| <b>Potri.015G033600</b> | up | down | MYB52     | myb domain protein 52                                                      |
| <b>Potri.009G010400</b> | up | down | NCRK      | Protein kinase superfamily protein                                         |
| <b>Potri.017G135000</b> | up | down | PUB21     | ARM repeat superfamily protein                                             |
| <b>Potri.010G096400</b> | up | down | AT1G60060 | Serine/threonine-protein kinase WNK (With No Lysine)-related               |
| <b>Potri.010G127600</b> | up | down | CXE17     | carboxyesterase 17                                                         |
| <b>Potri.015G088400</b> | up | down | AT1G24480 | S-adenosyl-L-methionine-dependent methyltransferases superfamily protein   |
| <b>Potri.005G183300</b> | up | down | AT1G21550 | Calcium-binding EF-hand family protein                                     |
| <b>Potri.013G066200</b> | up | down | UNE7      | Core-2/I-branching beta-1,6-N-acetylglucosaminyltransferase family protein |
| <b>Potri.002G258400</b> | up | down | AT1G35710 | Protein kinase family protein with leucine-rich repeat domain              |
| <b>Potri.002G030900</b> | up | down | BLH11     | BEL1-like homeodomain 11                                                   |

|                         |      |      |           |                                                                                                           |
|-------------------------|------|------|-----------|-----------------------------------------------------------------------------------------------------------|
| <b>Potri.018G117900</b> | up   | down | RLP1      | receptor like protein 1                                                                                   |
| <b>Potri.009G138900</b> | up   | down | AT2G16990 | Major facilitator superfamily protein                                                                     |
| <b>Potri.005G246100</b> | up   | down | PETE1     | plastocyanin 1                                                                                            |
| <b>Potri.004G056100</b> | up   | down | SAG12     | senescence-associated gene 12                                                                             |
| <b>Potri.005G095500</b> | up   | down | TPS21     | terpene synthase 21                                                                                       |
| <b>Potri.001G173700</b> | down | up   | AT3G15650 | alpha/beta-Hydrolases superfamily protein                                                                 |
| <b>Potri.004G078500</b> | down | up   | AT1G65720 | transmembrane protein                                                                                     |
| <b>Potri.004G044000</b> | down | up   | AT1G53035 | transmembrane protein                                                                                     |
| <b>Potri.010G155150</b> | down | up   |           |                                                                                                           |
| <b>Potri.002G122900</b> | down | up   | ASPG1     | N-terminal nucleophile aminohydrolases (Ntn hydrolases) superfamily protein                               |
| <b>Potri.004G020500</b> | down | up   | THI1      | thiazole biosynthetic enzyme, chloroplast (ARA6) (THI1) (THI4)                                            |
| <b>Potri.T092101</b>    | down | up   |           |                                                                                                           |
| <b>Potri.001G015300</b> | down | up   | LOX2      | lipoxygenase 2                                                                                            |
| <b>Potri.002G233200</b> | down | up   | AT5G16740 | Transmembrane amino acid transporter family protein                                                       |
| <b>Potri.004G054100</b> | down | up   | PDC2      | pyruvate decarboxylase-2                                                                                  |
| <b>Potri.001G076800</b> | down | up   | MPB2C     | movement protein binding protein 2C                                                                       |
| <b>Potri.T092101</b>    | down | up   |           |                                                                                                           |
| <b>Potri.016G083500</b> | down | up   | GSTL3     | Glutathione S-transferase family protein                                                                  |
| <b>Potri.006G262600</b> | down | up   | AT1G13940 | Plant protein of unknown function (DUF863)                                                                |
| <b>Potri.011G151100</b> | down | up   | AT4G10550 | Subtilase family protein                                                                                  |
| <b>Potri.019G128200</b> | down | up   | CHAL      | allergen-related                                                                                          |
| <b>Potri.012G022600</b> | down | up   | GRF7      | growth-regulating factor 7                                                                                |
| <b>Potri.005G103200</b> | down | up   | NAC036    | NAC domain containing protein 36                                                                          |
| <b>Potri.005G130100</b> | down | up   | AT5G66590 | CAP (Cysteine-rich secretory proteins, Antigen 5, and Pathogenesis-related 1 protein) superfamily protein |
| <b>Potri.T040800</b>    | down | up   | RLP9      | receptor like protein 9                                                                                   |
| <b>Potri.T143400</b>    | down | up   | PDC2      | pyruvate decarboxylase-2                                                                                  |
| <b>Potri.T092101</b>    | down | up   |           |                                                                                                           |
| <b>Potri.006G034900</b> | down | up   | AT3G10760 | Homeodomain-like superfamily protein                                                                      |
| <b>Potri.006G191900</b> | down | up   | KHZ2      | KH domain-containing protein / zinc finger (CCCH type) family protein                                     |
| <b>Potri.005G133400</b> | down | up   | AT1G33940 | Serine/Threonine-kinase ULK4-like protein                                                                 |
| <b>Potri.001G430100</b> | down | up   | AT3G20340 | protein expression protein                                                                                |
| <b>Potri.010G069700</b> | down | up   | AT3G25400 | dCTP pyrophosphatase-like protein                                                                         |
| <b>Potri.003G179400</b> | down | up   | AT5G12040 | Nitrilase/cyanide hydratase and apolipoprotein N-acyltransferase family protein                           |
| <b>Potri.019G130100</b> | down | up   | AT5G05280 | RING/U-box superfamily protein                                                                            |
| <b>Potri.014G055100</b> | down | up   | AT3G58610 | ketol-acid reductoisomerase                                                                               |

|                         |      |    |           |                                 |                             |  |
|-------------------------|------|----|-----------|---------------------------------|-----------------------------|--|
| <b>MSTRG.22028</b>      | down | up |           |                                 |                             |  |
| <b>Potri.005G178500</b> | down | up | AT1G77540 | Acyl-CoA<br>superfamily protein | N-acyltransferases<br>(NAT) |  |



Table.S4 The opposite expression co-DEGs on the compared tetraploid with diploid during recovery condition

| Gene name        | Te   | Di   | Gene symbol | Annotation                                                                   |
|------------------|------|------|-------------|------------------------------------------------------------------------------|
| Potri.017G010900 | up   | down | JAL34       | Mannose-binding lectin superfamily protein                                   |
| Potri.001G297466 | up   | down |             |                                                                              |
| Potri.017G082900 | up   | down | HB34        | homeobox protein 34                                                          |
| Potri.002G235200 | up   | down | PDS3        | phytoene desaturase 3                                                        |
| Potri.019G100001 | up   | down |             |                                                                              |
| Potri.011G159000 | up   | down | AT1G23460   | Pectin lyase-like superfamily protein                                        |
| Potri.005G133400 | up   | down | AT1G33940   | Serine/Threonine-kinase ULK4-like protein                                    |
| Potri.008G211900 | up   | down | AT1G23460   | Pectin lyase-like superfamily protein                                        |
| Potri.002G124500 | up   | down | AT5G67090   | Subtilisin-like serine endopeptidase family protein                          |
| Potri.005G256000 | up   | down | XCP2        | xylem cysteine peptidase 2                                                   |
| Potri.019G047200 | up   | down | ITPK1       | Inositol 1,3,4-trisphosphate 5/6-kinase family protein                       |
| Potri.001G119300 | up   | down | AT1G62760   | Plant invertase/pectin methylesterase inhibitor superfamily protein          |
| Potri.004G078500 | up   | down | AT1G65720   | transmembrane protein                                                        |
| Potri.019G058000 | up   | down | AT3G56360   | hypothetical protein                                                         |
| Potri.002G234400 | up   | down | ABCI14      | trigalactosyldiacylglycerol 1                                                |
| Potri.001G028200 | up   | down | AT3G54400   | Eukaryotic aspartyl protease family protein                                  |
| Potri.005G049000 | up   | down | AT1G54500   | Rubredoxin-like superfamily protein                                          |
| Potri.008G114100 | up   | down | AT4G11610   | C2 calcium/lipid-binding plant phosphorib-<br>osyltransferase family protein |
| Potri.002G026100 | down | up   | CYP83B1     | cytochrome P450, family 83, subfamily B, polypeptide 1                       |
| Potri.010G142800 | down | up   | AT4G16260   | Glycosyl hydrolase superfamily protein                                       |
| Potri.001G127700 | down | up   | NUDT2       | nudix hydrolase homolog 2                                                    |
| Potri.T167100    | down | up   | AT4G16260   | Glycosyl hydrolase superfamily protein                                       |
| Potri.005G093200 | down | up   | GSR2        | hypothetical protein                                                         |
| Potri.008G027500 | down | up   | AT3-MMP     | Matrixin family protein                                                      |
| Potri.002G025300 | down | up   | CYP83B1     | cytochrome P450, family 83, subfamily B, polypeptide 1                       |
| Potri.001G378700 | down | up   | AT3G20180   | Copper transport protein family                                              |
| Potri.003G192600 | down | up   | CXE17       | carboxyesterase 17                                                           |
| Potri.010G140032 | down | up   |             |                                                                              |
| Potri.006G255100 | down | up   | AT1G56130   | Leucine-rich repeat transmembrane protein kinase                             |

|                         |      |    |           |                                                                          |
|-------------------------|------|----|-----------|--------------------------------------------------------------------------|
| <b>Potri.007G059300</b> | down | up | AAE1      | acyl activating enzyme 1                                                 |
| <b>Potri.005G079400</b> | down | up | AO        | Cupredoxin superfamily protein                                           |
| <b>Potri.006G110900</b> | down | up | AT2G38600 | HAD superfamily, subfamily IIIB acid phosphatase                         |
| <b>Potri.005G095500</b> | down | up | TPS21     | terpene synthase 21                                                      |
| <b>Potri.001G304800</b> | down | up | CCoAOMT1  | S-adenosyl-L-methionine-dependent methyltransferases superfamily protein |
| <b>Potri.001G462700</b> | down | up | MEE23     | FAD-binding Berberine family protein                                     |
| <b>Potri.004G026000</b> | down | up | CRK25     | cysteine-rich RLK (RECEPTOR-like prot-ein kinase) 25                     |
| <b>Potri.009G064900</b> | down | up | CYP87A2   | cytochrome P450, family 87, subfamily A, polypeptide 2                   |
| <b>Potri.013G134500</b> | down | up | AT1G03670 | ankyrin repeat family protein                                            |
| <b>Potri.014G168400</b> | down | up | NUDT2     | nudix hydrolase homolog 2                                                |
| <b>Potri.001G375200</b> | down | up | GLR2.7    | glutamate receptor 2.7                                                   |
| <b>Potri.010G127600</b> | down | up | CXE17     | carboxyesterase 17                                                       |
| <b>Potri.007G088400</b> | down | up | AAT       | aspartate aminotransferase                                               |
| <b>Potri.003G216400</b> | down | up | AT1G58170 | Disease resistance-responsive (dirigent-like protein) family protein     |
| <b>Potri.004G024900</b> | down | up | CRK25     | cysteine-rich RLK (RECEPTOR-like protein kinase) 25                      |
| <b>Potri.001G221800</b> | down | up | AT1G75800 | Pathogenesis-related thaumatin superfamily protein                       |
| <b>Potri.001G102400</b> | down | up | OSM34     | osmotin 34                                                               |
| <b>Potri.001G255100</b> | down | up | AT4G16260 | Glycosyl hydrolase superfamily protein                                   |
| <b>Potri.006G234300</b> | down | up | OZF2      | Zinc finger C-x8-C-x5-C-x3-H type family protein                         |
| <b>Potri.016G045000</b> | down | up | LECRK-S.5 | Concanavalin A-like lectin protein kinase family protein                 |
| <b>Potri.004G012600</b> | down | up | CRK10     | cysteine-rich RLK (RECEPTOR-like prot-ein kinase) 10                     |
| <b>Potri.013G090300</b> | down | up | WRKY70    | WRKY DNA-binding protein 70                                              |
| <b>Potri.004G068000</b> | down | up | AT5G08350 | GRAM domain-containing protein / ABA-responsive protein-related          |
| <b>Potri.003G087000</b> | down | up | EXPR      | expansin-like B1                                                         |
| <b>Potri.017G004300</b> | down | up | BIR1      | BAK1-interacting receptor-like kinase 1                                  |
| <b>Potri.017G050200</b> | down | up | AGP1      | arabinogalactan protein 1                                                |
| <b>Potri.001G099400</b> | down | up | ACS6      | 1-aminocyclopropane-1-carboxylic acid (acc) synthase 6                   |
| <b>Potri.017G003301</b> | down | up |           |                                                                          |
| <b>Potri.008G159300</b> | down | up | CML11     | calmodulin-like 11                                                       |

|                         |      |    |           |                                                                |
|-------------------------|------|----|-----------|----------------------------------------------------------------|
| <b>Potri.011G047300</b> | down | up | LPA1      | tetratricopeptide repeat (TPR)-containing protein              |
| <b>Potri.013G043100</b> | down | up | AT1G01225 | NC domain-containing protein-related                           |
| <b>Potri.009G064900</b> | down | up | CYP87A2   | cytochrome P450, family 87, subfamily A, polypeptide 2         |
| <b>Potri.015G061600</b> | down | up | NILR1     | Leucine-rich repeat protein kinase family protein              |
| <b>Potri.004G025100</b> | down | up | CRK10     | cysteine-rich RLK (RECEPTOR-like protein kinase) 10            |
| <b>Potri.017G003400</b> | down | up | BIR1      | BAK1-interacting receptor-like kinase 1                        |
| <b>Potri.002G077300</b> | down | up | AT1G21550 | Calcium-binding EF-hand family protein                         |
| <b>Potri.001G192100</b> | down | up | BCB       | blue-copper-binding protein                                    |
| <b>Potri.016G116800</b> | down | up | AT5G55720 | Pectin lyase-like superfamily protein                          |
| <b>Potri.001G412400</b> | down | up | RK3       | receptor kinase 3                                              |
| <b>Potri.016G106800</b> | down | up | AT3G54040 | PAR1 protein                                                   |
| <b>Potri.008G197400</b> | down | up | NSH3      | inosine-uridine preferring nucleoside hydrolase family protein |
| <b>Potri.016G141900</b> | down | up | ORP4B     | OSBP(oxysterol binding protein)-related protein 4B             |
| <b>Potri.007G049900</b> | down | up | CYP81D8   | cytochrome P450, family 81, subfamily D, polypeptide 8         |
| <b>Potri.002G190800</b> | down | up | NIMIN-1   | NIM1-interacting 1                                             |
| <b>Potri.001G413400</b> | down | up | RK3       | receptor kinase 3                                              |
| <b>Potri.011G158700</b> | down | up | MEE23     | FAD-binding Berberine family protein                           |
| <b>Potri.005G063700</b> | down | up | PUB25     | plant U-box 25                                                 |
| <b>Potri.T079700</b>    | down | up | AT4G39830 | Cupredoxin superfamily protein                                 |
| <b>Potri.001G228300</b> | down | up | RLK1      | receptor-like protein kinase 1                                 |
| <b>Potri.015G044750</b> | down | up |           |                                                                |
| <b>Potri.004G091400</b> | down | up | HTB9      | Histone superfamily protein                                    |
| <b>Potri.001G461700</b> | down | up | AT4G20820 | FAD-binding Berberine family protein                           |
| <b>Potri.003G075800</b> | down | up | AT3G22160 | VQ motif-containing protein                                    |
| <b>Potri.009G094500</b> | down | up | AT2G15220 | Plant basic secretory protein (BSP) family protein             |
| <b>Potri.018G117900</b> | down | up | RLP1      | receptor like protein 1                                        |
| <b>Potri.004G180500</b> | down | up | sks5      | SKU5 similar 5                                                 |
| <b>Potri.015G015800</b> | down | up | NGA4      | AP2/B3-like transcriptional factor family protein              |
| <b>Potri.001G221200</b> | down | up | AT1G75800 | Pathogenesis-related thaumatin superfamily protein             |
| <b>Potri.014G019700</b> | down | up | VEP1      | NAD(P)-binding Rossmann-fold superfamily protein               |
| <b>Potri.002G012900</b> | down | up | AT1G47670 | Transmembrane amino acid transporter                           |

|                         |      |    |           |                                                                          |
|-------------------------|------|----|-----------|--------------------------------------------------------------------------|
| <b>Potri.T090800</b>    | down | up | CRK25     | family protein<br>cysteine-rich RLK (RECEPTOR-like protein kinase) 25    |
| <b>Potri.011G081701</b> | down | up |           |                                                                          |
| <b>Potri.004G056000</b> | down | up | SAG12     | senescence-associated gene 12                                            |
| <b>Potri.006G218500</b> | down | up | RGIL6     | Rhamnogalacturonate lyase family protein                                 |
| <b>Potri.006G042200</b> | down | up | AT2G41380 | S-adenosyl-L-methionine-dependent methyltransferases superfamily protein |
| <b>Potri.018G043000</b> | down | up | CCD1      | carotenoid cleavage dioxygenase 1                                        |
| <b>Potri.012G054700</b> | down | up | LRK10L1.2 | Protein kinase superfamily protein                                       |
| <b>Potri.T079500</b>    | down | up | AT4G39830 | Cupredoxin superfamily protein                                           |
| <b>Potri.006G023151</b> | down | up |           |                                                                          |
| <b>Potri.001G221400</b> | down | up | AT1G75800 | Pathogenesis-related thaumatin superfamily protein                       |
| <b>Potri.017G150560</b> | down | up |           |                                                                          |
| <b>Potri.002G091500</b> | down | up | ALD1      | AGD2-like defense response protein 1                                     |
| <b>Potri.011G114600</b> | down | up | TAX2      | taximin                                                                  |
| <b>Potri.017G018800</b> | down | up | ESD4      | Cysteine proteinases superfamily protein                                 |
| <b>Potri.017G005800</b> | down | up | AT3G59850 | Pectin lyase-like superfamily protein                                    |
| <b>Potri.001G294100</b> | down | up | VDAC2     | voltage dependent anion channel 2                                        |
| <b>Potri.010G020200</b> | down | up | AT4G27290 | S-locus lectin protein kinase family protein                             |
| <b>Potri.013G041900</b> | down | up | PR4       | pathogenesis-related 4                                                   |
| <b>Potri.003G013700</b> | down | up | RLP15     | receptor like protein 15                                                 |
| <b>Potri.012G067600</b> | down | up | AT1G74360 | Leucine-rich repeat protein kinase family protein                        |
| <b>Potri.006G036200</b> | down | up | AAE11     | AMP-dependent synthetase and ligase family protein                       |
| <b>Potri.017G006200</b> | down | up | AT3G59850 | Pectin lyase-like superfamily protein                                    |
| <b>Potri.006G209200</b> | down | up | NAC090    | NAC domain containing protein 90                                         |
| <b>Potri.001G070700</b> | down | up | AT1G28190 | hypothetical protein                                                     |
| <b>Potri.005G043700</b> | down | up | AT1G51790 | Leucine-rich repeat protein kinase family protein                        |

Table S5 Read abundance of various classes of sRNAs sequences in eighteen libranes

| Type           | Category     | Raw reads | Valid reads | rRNA    | tRNA   | snoRNA | snRNA | Other Rfam RNA |
|----------------|--------------|-----------|-------------|---------|--------|--------|-------|----------------|
| <b>CK_Di1</b>  | Total reads  | 14131837  | 10323827    | 731674  | 114900 | 17816  | 14332 | 21262          |
|                | Unique reads | 2012058   | 1186829     | 11778   | 1579   | 1063   | 632   | 1106           |
| <b>CK_Di2</b>  | Total reads  | 12772905  | 8527271     | 683660  | 118022 | 17014  | 13493 | 18535          |
|                | Unique reads | 1905815   | 1126023     | 10904   | 1648   | 1072   | 624   | 990            |
| <b>CK_Di3</b>  | Total reads  | 14094520  | 8281943     | 768616  | 68246  | 18862  | 14496 | 22135          |
|                | Unique reads | 1954982   | 1030869     | 12376   | 1319   | 1108   | 543   | 1057           |
| <b>CK_Te1</b>  | Total reads  | 13815380  | 9707436     | 652849  | 106981 | 17131  | 12172 | 19893          |
|                | Unique reads | 1882722   | 1198106     | 8991    | 1298   | 1006   | 549   | 976            |
| <b>CK_Te2</b>  | Total reads  | 10211545  | 7602773     | 481340  | 65645  | 11889  | 9602  | 16337          |
|                | Unique reads | 1567928   | 1019539     | 7852    | 977    | 805    | 454   | 871            |
| <b>CK_Te3</b>  | Total reads  | 13471409  | 10272776    | 584941  | 105579 | 16039  | 12779 | 18526          |
|                | Unique reads | 2126854   | 1450898     | 8098    | 1294   | 1022   | 551   | 994            |
| <b>Dro_Di1</b> | Total reads  | 14024315  | 10278377    | 718732  | 111249 | 22193  | 20198 | 19943          |
|                | Unique reads | 1763471   | 1073347     | 10846   | 1645   | 1249   | 721   | 1048           |
| <b>Dro_Di2</b> | Total reads  | 14748966  | 10339159    | 674179  | 101846 | 17897  | 15028 | 23665          |
|                | Unique reads | 1792977   | 1072825     | 10722   | 1660   | 1069   | 654   | 1128           |
| <b>Dro_Di3</b> | Total reads  | 18914322  | 13642486    | 662823  | 92536  | 21904  | 20333 | 25621          |
|                | Unique reads | 2599613   | 1724704     | 10944   | 1757   | 1205   | 822   | 1221           |
| <b>Dro_Te1</b> | Total reads  | 12622437  | 9874433     | 855291  | 131078 | 30942  | 15176 | 26661          |
|                | Unique reads | 1624828   | 1018478     | 10949   | 1806   | 1327   | 575   | 1079           |
| <b>Dro_Te2</b> | Total reads  | 13039587  | 9459234     | 735755  | 137269 | 24546  | 14877 | 34212          |
|                | Unique reads | 1963133   | 1049561     | 13477   | 2101   | 1203   | 567   | 1314           |
| <b>Dro_Te3</b> | Total reads  | 14353470  | 11125393    | 1010233 | 161701 | 33180  | 16036 | 37768          |
|                | Unique reads | 1842820   | 1037637     | 11966   | 2059   | 1355   | 624   | 1246           |

|               |              |          |          |         |        |       |       |       |
|---------------|--------------|----------|----------|---------|--------|-------|-------|-------|
| <b>Re_Di1</b> | Total reads  | 16115294 | 11119500 | 1445666 | 300898 | 43793 | 30889 | 46109 |
|               | Unique reads | 1866059  | 911548   | 16639   | 3429   | 1695  | 891   | 1472  |
| <b>Re_Di2</b> | Total reads  | 11164382 | 8164513  | 763890  | 182356 | 30295 | 18097 | 23750 |
|               | Unique reads | 1455943  | 809220   | 10769   | 1747   | 1315  | 568   | 1071  |
| <b>Re_Di3</b> | Total reads  | 15732765 | 11992908 | 813254  | 365505 | 28853 | 23920 | 33186 |
|               | Unique reads | 2074777  | 1241489  | 10701   | 2030   | 1342  | 722   | 1264  |
| <b>Re_Te1</b> | Total reads  | 11814243 | 8872001  | 572542  | 163855 | 19900 | 17312 | 40286 |
|               | Unique reads | 1858082  | 1083583  | 10251   | 1589   | 1013  | 573   | 1113  |
| <b>Re_Te2</b> | Total reads  | 9747252  | 7743966  | 495190  | 117072 | 16764 | 13068 | 18646 |
|               | Unique reads | 1464652  | 932175   | 8694    | 1322   | 898   | 480   | 921   |
| <b>Re_Te3</b> | Total reads  | 12417596 | 9617902  | 591224  | 194520 | 23359 | 19707 | 29323 |
|               | Unique reads | 1864821  | 1206938  | 9216    | 1429   | 1141  | 620   | 1078  |

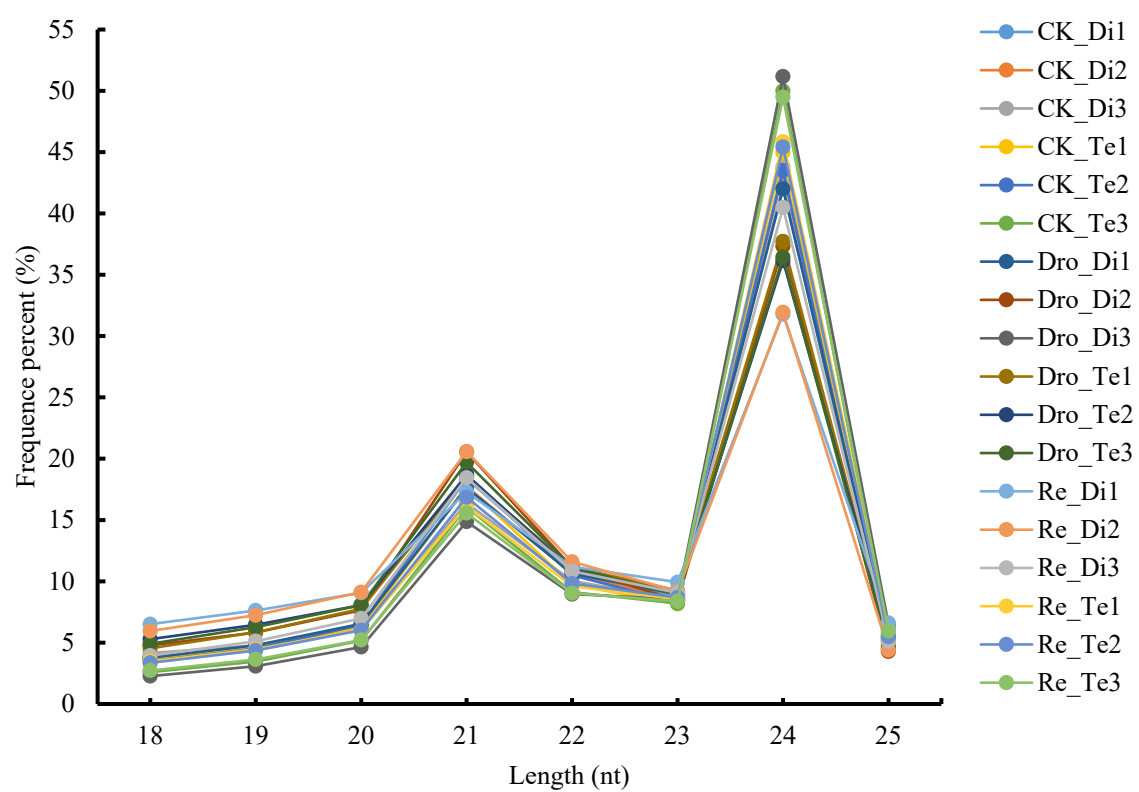

Figure S1 Size distribution of small RNA
